# Supplementary material for: Reduced graphene oxide nanoribbon immobilized gold nanoparticle based electrochemical DNA biosensor for the detection of Mycobacterium tuberculosis
Source: Royal Society of Chemistry journal article supplement (doi:10.1039/c8tb01604f), 2018-01-01
Supplement: c8tb01604f1.pdf [file c8tb01604f1.pdf]

**Reduced graphene oxide nanoribbon immobilized gold nanoparticles based electrochemical DNA biosensor for detection of *Mycobacterium tuberculosis***

Navin Kumar Mogha, Vikrant Sahu, Raj Kishore Sharma\*, Dhanraj T. Masram\*

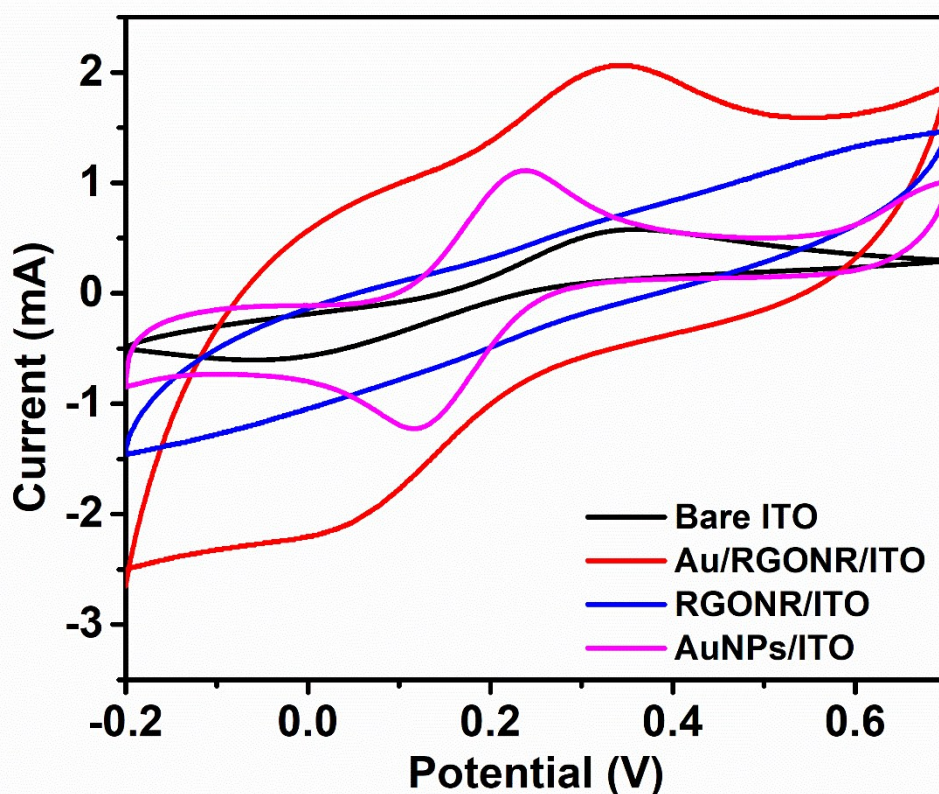

Figure S1, Comparative Cyclic voltammograms for bare ITO, Au/RGONR/ITO, RGONR/ITO and AuNPs/ITO electrodes in Zobell's Solution at scan rate of 50 mVs<sup>-1</sup>

CV represented here clearly indicate that Au/RGONR/ITO electrode have better conductive performance as compared to others to be utilized as platform for DNA immobilization.

**Table S1 Elemental percentage obtained using EDX of Au/RGONR**

| Element | Weight % | Atomic % |
|---------|----------|----------|
| C(K)    | 77.23    | 84.05    |
| O(K)    | 14.88    | 13.82    |
| Cu(K)   | 6.04     | 1.83     |
| Au(K)   | 1.81     | 0.28     |

Cu(K) is present due to use of carbon coated copper grid for TEM sample preparation
